# Supplementary material for: B cell lymphoma 6A regulates immune development and function in zebrafish
Source: PubMed Central journal article supplement (PMC9650189; doi:10.3389/fcimb.2022.887278), 2022-10-28
Supplement: DataSheet_1.pdf [file DataSheet_1.pdf]

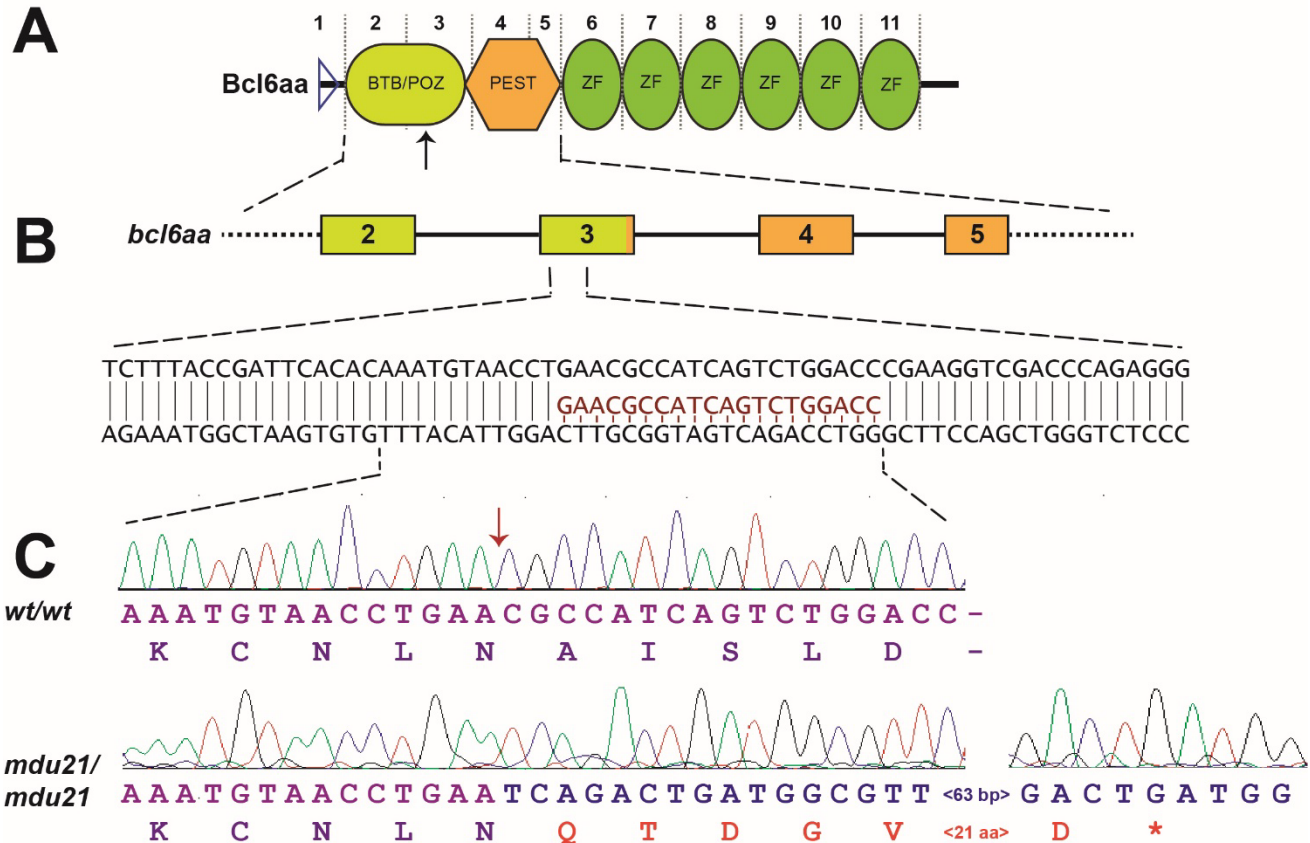

**Supplementary Figure 1. Targeting zebrafish *bcl6aa* with CRISPR/Cas9.**

A. Schematic representation of zebrafish Bcl6aa protein showing its constituent domains, including the targeted BTB/POZ domain (light green), PEST domain (orange) and ZF domain (dark green). The relative positions of intron/exon boundaries are indicated with vertical dotted lines and exon numbers, with the targeting site designated with a black arrow.

B. Schematic diagram of exons 2-5 of the zebrafish *bcl6aa* gene including an expanded view of the sequence of exon 3 targeted by CRISPR/Cas9 with the gRNA sequence shown in red.

C. Sequence chromatograms and corresponding nucleotide and encoded amino acid sequences obtained from homozygous *bcl6aa*<sup>wt/wt</sup> (*wt/wt*) and *bcl6aa*<sup>mdu21/mdu21</sup> (*mdu21/mdu21*) individuals. The red arrow indicates the position where *de novo* nucleotides (blue) were inserted into the original sequence (purple) in the mutant to mediate divergence of the encoded protein, with the alternate residues shown in red.

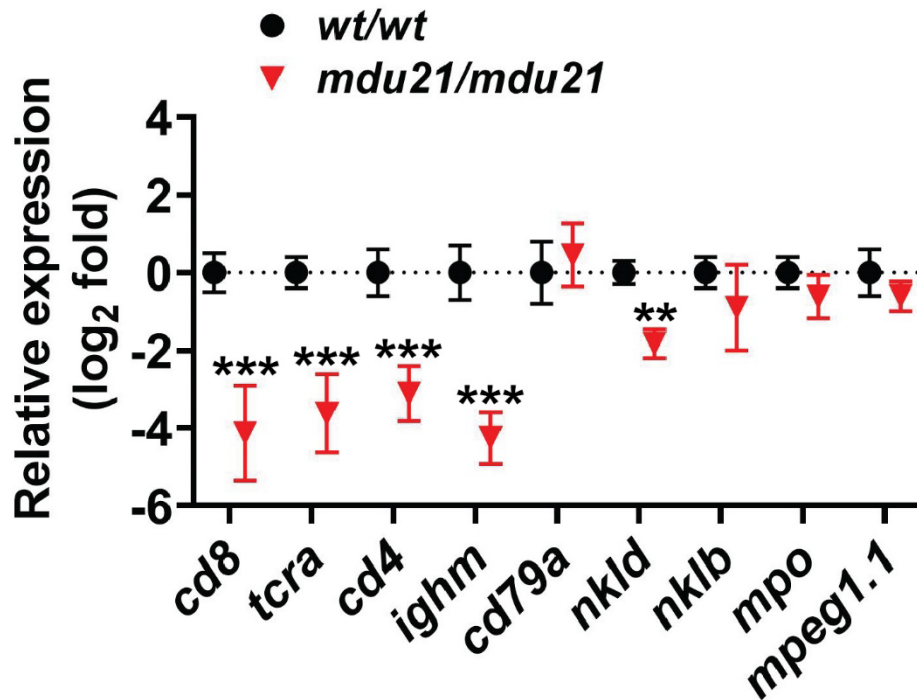

**Supplementary Figure 2.** Analysis of hematopoietic markers in 28 dpf juvenile zebrafish *bcl6aa* mutants.

Total RNA derived from homozygous *bcl6aa*<sup>wt/wt</sup> (*wt/wt*) and *bcl6aa*<sup>*mdu21/mdu21*</sup> (*mdu21/mdu21*) individuals was subjected to qRT<sup>2</sup>-PCR with gene markers of T cells (*cd8*, *tcra*, *cd4*), B cells (*ighm*, *cd79a*), NK cells (*nkld*, *nklb*), neutrophils (*mpo*) and monocyte/macrophages (*mpeg1.1*) (B). Data was normalized relative to *actb* and represented as relative fold change compared to wild-type fish, with mean and SD shown and statistical significance indicated (\*\*:  $p < 0.01$ , \*\*\*:  $p < 0.001$ ,  $n=6$ ).
